# Supplementary figures and images for: Genistein stimulates insulin sensitivity through gut microbiota reshaping and skeletal muscle AMPK activation in obese subjects
Source: PubMed Central journal article supplement — BMJ Open Diabetes Res Care. 2020 Mar 9;8(1):e000948. doi: 10.1136/bmjdrc-2019-000948 (PMC7064085; doi:10.1136/bmjdrc-2019-000948), 2020-03-09

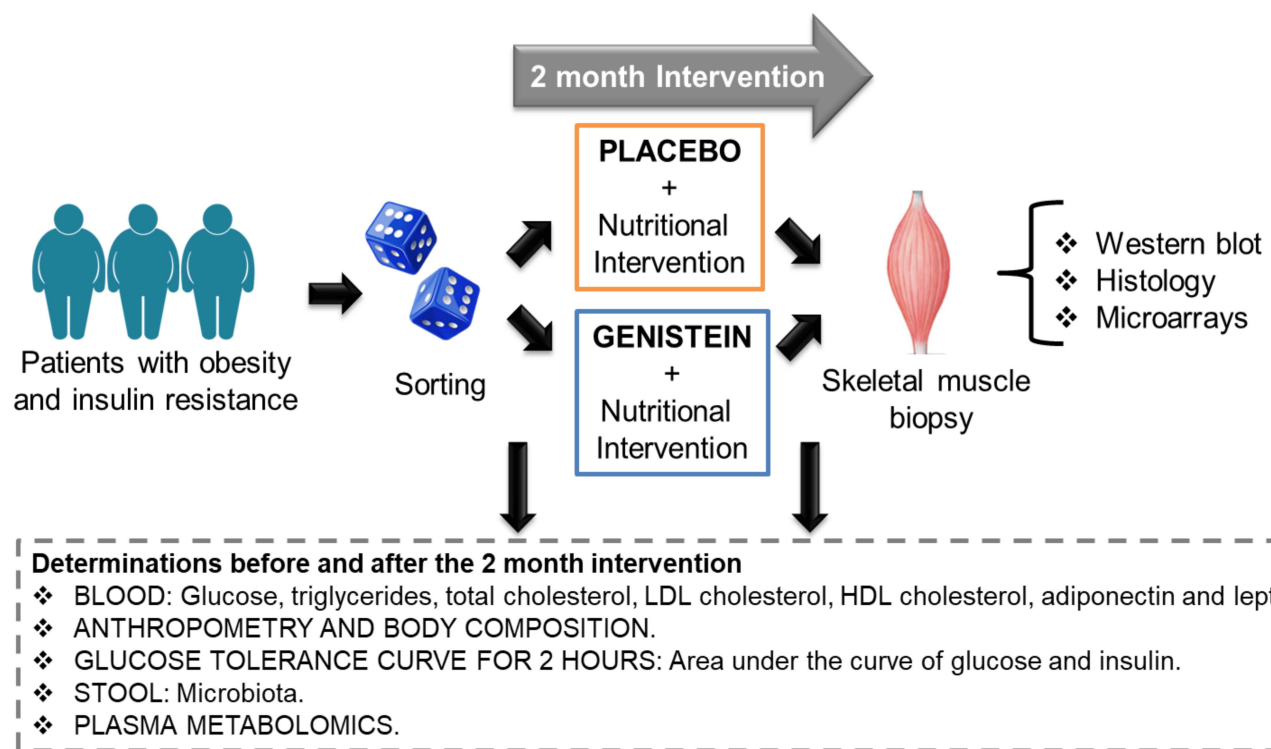

Supplement: bmjdrc-2019-000948supp001.pdf [file bmjdrc-2019-000948supp001.pdf]

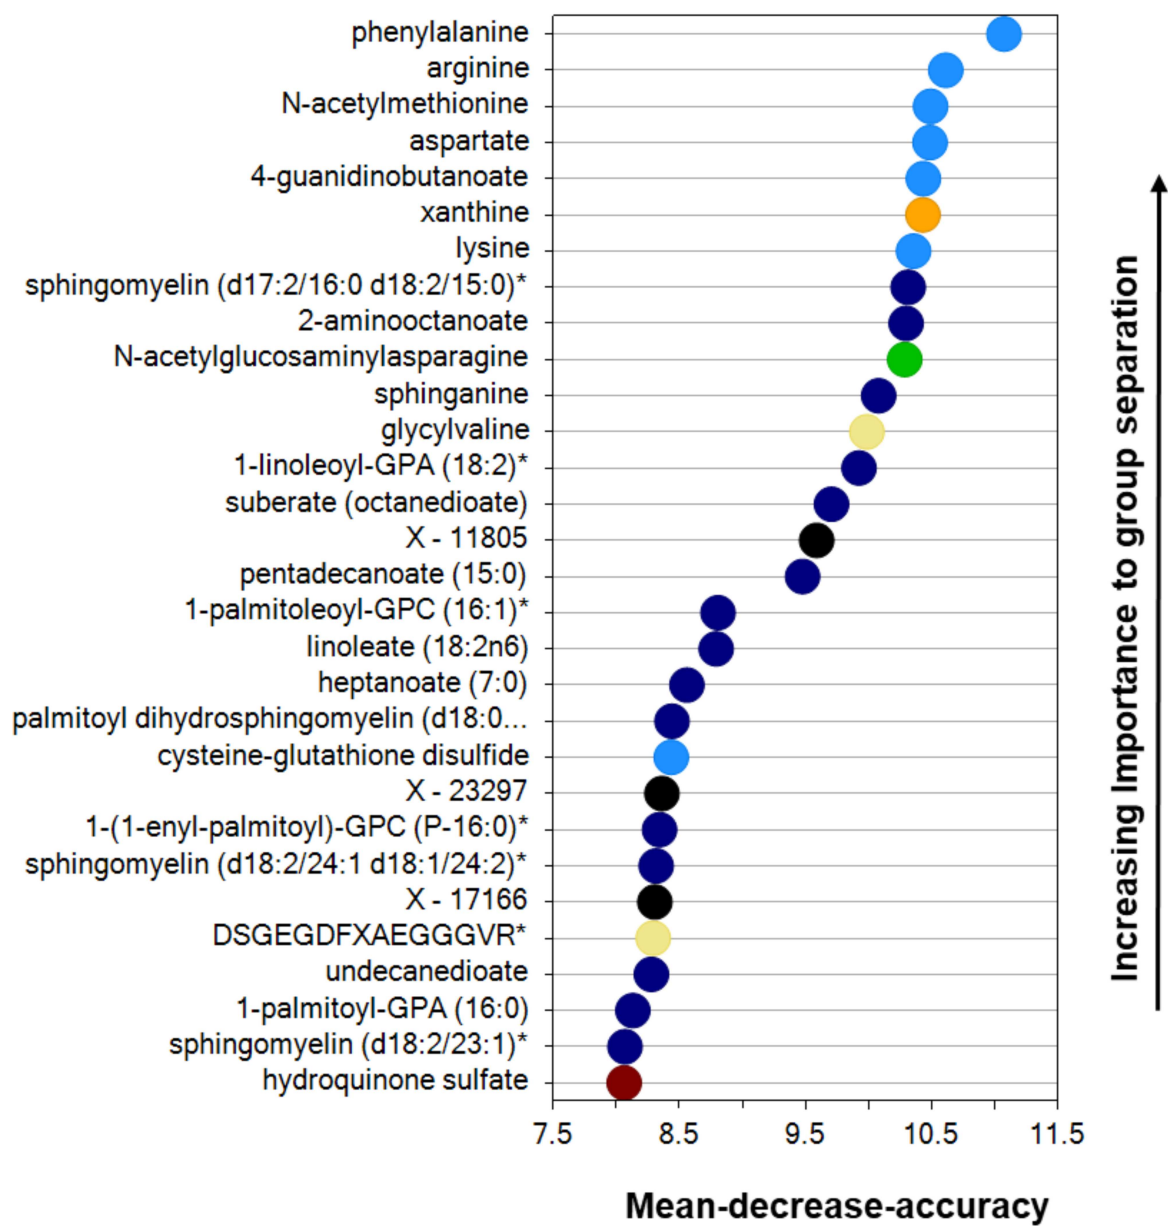

Supplement: bmjdrc-2019-000948supp003.pdf [file bmjdrc-2019-000948supp003.pdf]
